# Supplementary material for: Subnanometer-thick 2D GaN film with a large bandgap synthesized by plasma enhanced chemical vapor deposition
Source: Royal Society of Chemistry journal article supplement (doi:10.1039/d1ta10450k), 2022-01-01
Supplement: d1ta10450k1.pdf [file d1ta10450k1.pdf]

**Supporting Information for**

**Subnanometer-thick 2D GaN film with large bandgap**

**synthesized by plasma enhanced chemical vapor deposition**

Gehui Zhang<sup>1#</sup>, Luchen Chen<sup>1#</sup>, Le Wang<sup>1</sup>, Zhanjie Lu<sup>1</sup>, Haoyu Dong<sup>1</sup>, Zhihai  
Cheng<sup>1</sup>, Xu Zhang<sup>2\*</sup>, Xiaohui Xu<sup>3</sup>, Bin Wang<sup>3</sup>, Shanshan Chen<sup>1\*</sup>.

<sup>1</sup> *Department of Physics and Beijing Key Laboratory of Optoelectronic Functional Natural  
Materials&Micro-nano Devices, Renmin University of China, Beijing 100872, China*

<sup>2</sup> *Faculty of Materials and Manufacturing, Beijing University of Technology, Beijing 100124,  
China*

<sup>3</sup> *National Center for Nanoscience and Technology, Beijing, 100190, China*

\* Corresponding authors: schen@ruc.edu.cn; zhangx@bjut.edu.cn.

## **Experimental section**

### **Characterization**

A Park NX10 AFM was applied to study the thickness and morphology of samples under non-contact mode. Thermo ESCALAB 250Xi XPS spectrometer equipped with a monochromatic Al K $\alpha$  source was applied to obtain the chemical states. UV-vis absorption spectroscopy (Agilent Cary 60) was conducted on GaN film deposited on quartz plate. TEM (JEOL 2100F) with acceleration voltages of 200 kV was applied to characterize the crystalline structure of the samples.

### **Nitridation synthesis of 2D GaN film via PECVD**

The as-prepared Ga<sub>2</sub>O<sub>3</sub> film deposited on SiO<sub>2</sub>/Si wafer was placed on a quartz boat in a sample film down position and further sent to the center of a quartz tube furnace. The system was heated up to 800 °C in 20 sccm Ar at a heating rate of 20 °C/min. Then 10 sccm N<sub>2</sub> was introduced to the chamber (initial pressure: 6 pa) with the microwave power set to 10 W. With the generation of nitrogen plasma, the chamber pressure slightly rose to 6.4 pa. The nitridation lasted for 2-60 min and then the system was cooled quickly to room temperature in 20 sccm Ar.

### **Fabrication of Ga<sub>2</sub>O<sub>3</sub> film**

As expected for a temperature-activated oxidation process, the Ga<sub>2</sub>O<sub>3</sub> oxide thickness is studied to be increases with temperature <sup>1</sup>. It has been reported that low growth temperature (< 100 °C) result in oxide thickness below 4 nm <sup>2</sup>. Through a series of experiments, we found that 50 °C is an appropriate choice to fabricate uniform and thin Ga<sub>2</sub>O<sub>3</sub> film as well as to facilitate the manual operations on the hot plate. In order to obtain the template film in a controlled manner, we studied the effect of the oxidation time on the thickness of the Ga<sub>2</sub>O<sub>3</sub> film. During the squeeze-printing process, the liquid Ga droplet was left on the hotplate (under 50 °C) for 1 min and 5 min, respectively. As shown in Figure S2, the two Ga<sub>2</sub>O<sub>3</sub> samples exhibit constant thickness, which is usually associated with the limiting oxide thickness achieved under low temperature <sup>3</sup>.

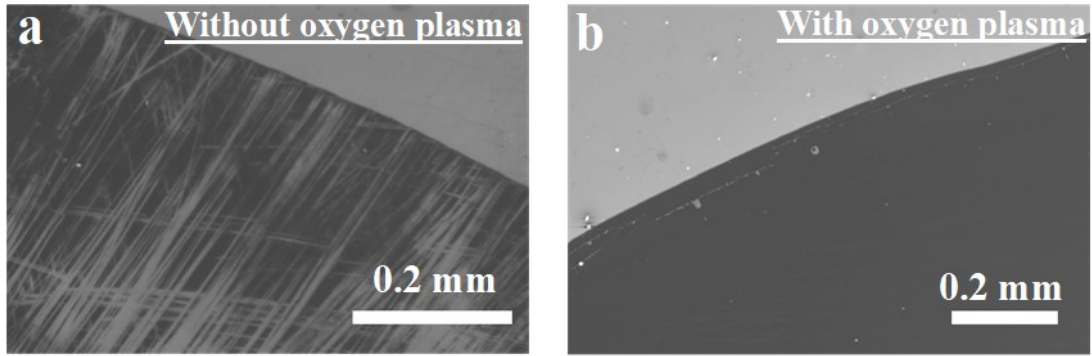

**Fig. S1** The  $\text{Ga}_2\text{O}_3$  films obtained by the squeeze-oxidation of Ga on the  $\text{SiO}_2/\text{Si}$  wafer without (a) and with (b) oxygen plasma cleaning.

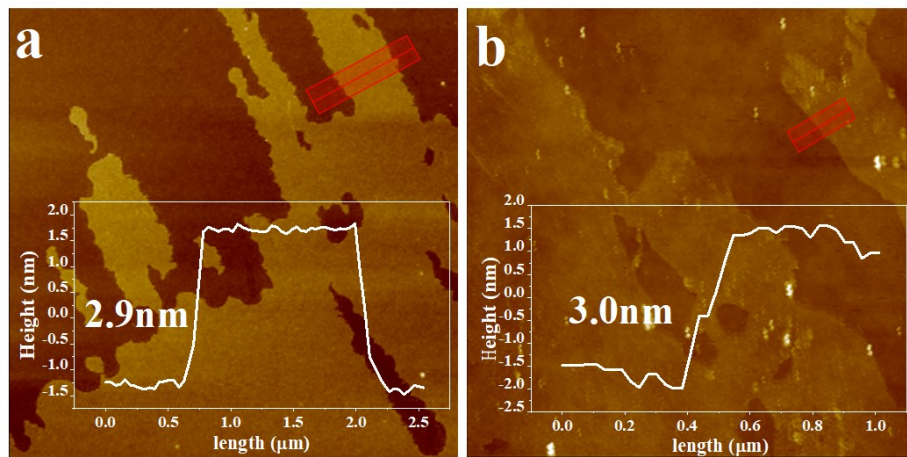

**Fig. S2** AFM height profiles of the  $\text{Ga}_2\text{O}_3$  films on the  $\text{SiO}_2/\text{Si}$  wafers fabricated by the oxidation under  $50\text{ }^\circ\text{C}$  for 1 min (a) and 5 min (b), respectively, which shows the thickness of the  $\text{Ga}_2\text{O}_3$  film is independent of the oxidation time.

### **Thicker $\text{Ga}_2\text{O}_3$ film obtained from reprint method.**

Repeating the squeeze-printing deposition process for three times, thicker  $\text{Ga}_2\text{O}_3$  template film up to 8 nm can be obtained as shown in Fig. S3a. After the same nitridation process (10 sccm  $\text{N}_2$  flow, under  $800\text{ }^\circ\text{C}$  for 20 min), GaN film with a thickness of  $\sim 0.9\text{ nm}$  was achieved as displayed in Fig. S3b. The thickness of the 2D GaN is independent of the thickness of the initial  $\text{Ga}_2\text{O}_3$ , which further supports the thinning of the template due to the nitrogen ion etching.

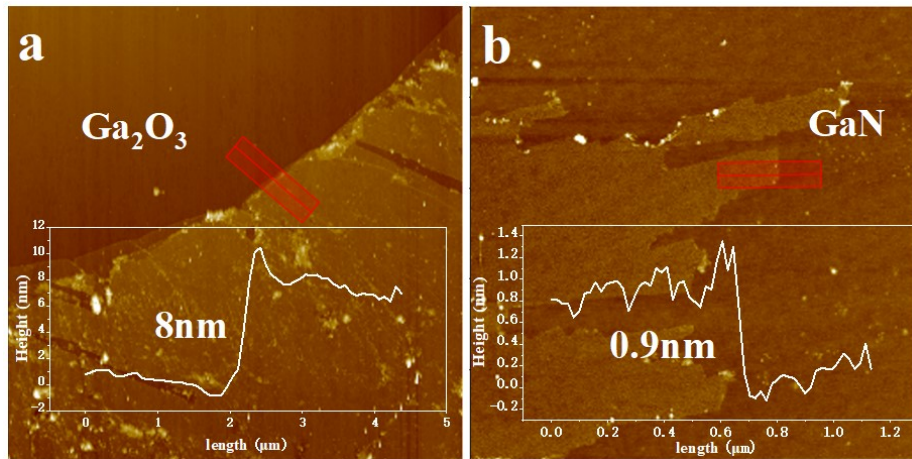

**Fig. S3** AFM height profiles of (a) thick  $\text{Ga}_2\text{O}_3$  film obtain from repeating the squeeze-oxidation process, and (b) the as-grown GaN nanosheet after  $\text{N}_2$  plasma nitridation of the thick  $\text{Ga}_2\text{O}_3$  film.

### XPS of the $\text{Ga}_2\text{O}_3$ template

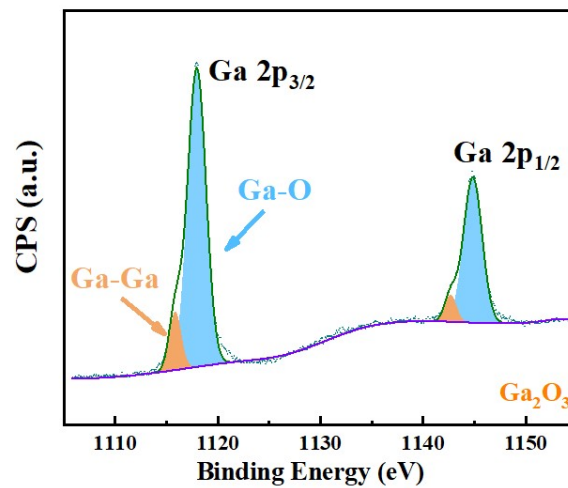

**Fig. S4** XPS  $\text{Ga}2p$  spectra of the  $\text{Ga}_2\text{O}_3$  film. The  $\text{Ga-Ga}$  peak marked in yellow suggests the residual Ga metal.

## EDS of the GaN

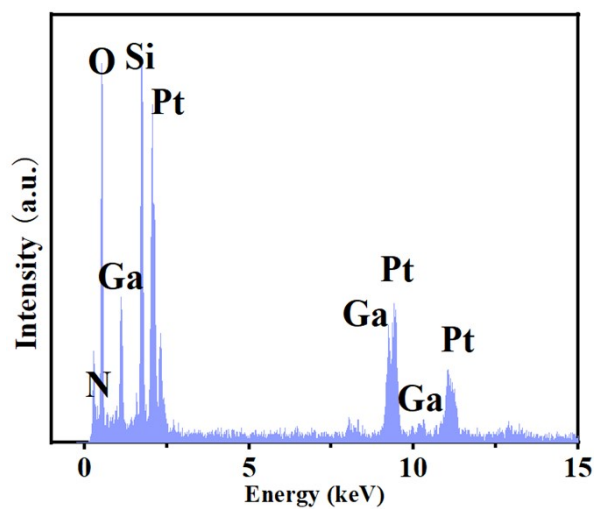

Fig. S5 EDS data of GaN region in Fig. 2g.

### Preparation of 2D GaN on SiN<sub>x</sub> grid for TEM Characterization.

The direct transfer of 2D GaN film from SiO<sub>2</sub>/Si wafer to the TEM grid is challenging. Here, the Ga<sub>2</sub>O<sub>3</sub> was firstly transferred onto the SiN<sub>x</sub> grid through the van der Waals exfoliation method reported previously<sup>4</sup>, where the Ga<sub>2</sub>O<sub>3</sub> skin was exfoliated from the surface of liquid Ga by a SiN<sub>x</sub> grid with gentle touch. Then the Ga<sub>2</sub>O<sub>3</sub> on SiN<sub>x</sub> sample was sent into PECVD for further nitridation. The nitridation process and growth condition is the same as that on the SiO<sub>2</sub>/Si wafer. Eventually, 2D GaN nanosheet on SiN<sub>x</sub> grid was fabricated successfully.

## Etching effect of N<sub>2</sub> plasma

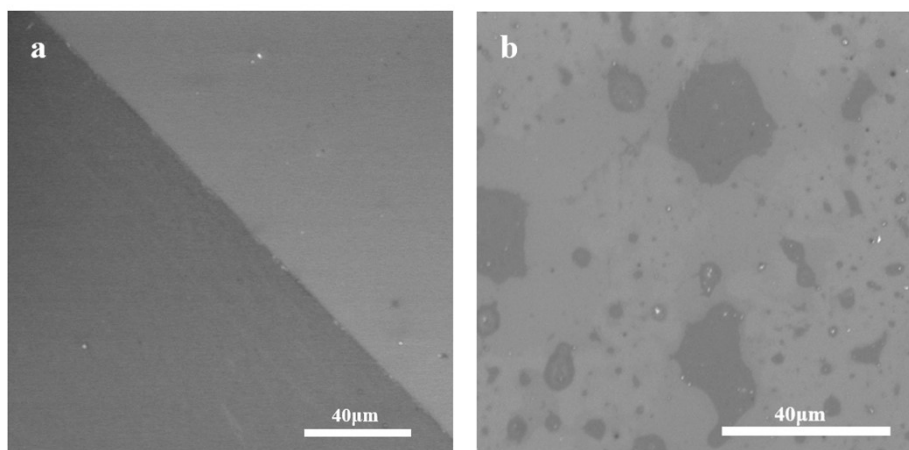

**Fig. S6** SEM images of the GaN film with the reaction time for (a) 20 min and (b) 50 min, showing that the continuous film can be damaged into nanoislands owing to the severe etching effect of N<sub>2</sub> plasma.

## The effect of Nitrogen gas flow and plasma power on the PECVD growth of 2D GaN

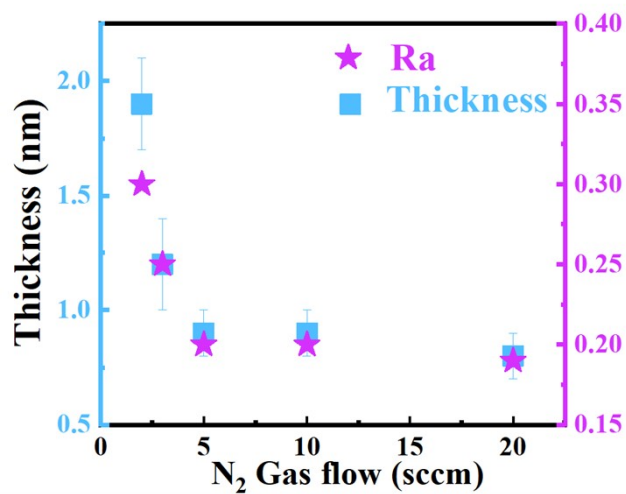

**Fig. S7** Nitrogen gas flow-dependent thickness and roughness of the as-synthesized 2D GaN film. The growth time and the plasma power are fixed at 10 min and 10 W, respectively

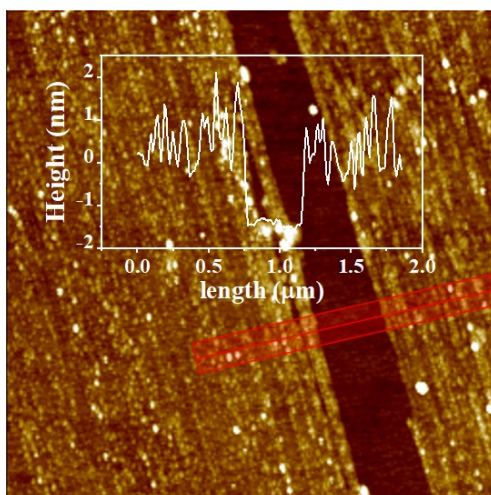

**Fig. S8** AFM height profile of the GaN film under high plasma power (100 W) for 20 min.

### **Preparation of 2D GaN using urea as reactant through ambient pressure CVD**

The Ga<sub>2</sub>O<sub>3</sub> film on the SiO<sub>2</sub>/Si wafer fabricated through the same squeeze-oxidation process was sent to the normal ambient pressure CVD (APCVD) system. Urea was applied as an ammonia precursor to react with Ga<sub>2</sub>O<sub>3</sub> at 800°C for 90min similar as previous reports<sup>5</sup>. Ar gas with a flow rate of 50 sccm was supplied as the carrier gas throughout the whole growth process. The thickness of obtained GaN film was ~ 2.8 nm as illustrated in figure S9a, the same as the Ga<sub>2</sub>O<sub>3</sub> template. The XPS N1s and Ga 2p spectra show peak locations indicative for GaN, and no peaks associated with elemental Ga and Ga<sub>2</sub>O<sub>3</sub> were observed (Figure S8 c-d). The O1s spectrum (Figure S8 e). of the GaN film show small Ga-O peak (marked in red) at 530.7 eV and large Si-O peak (marked in blue) at 532.3 eV, respectively. The non-negligible Ga-O peak could be attributed to a substantial fraction of nitrogen sites been substituted by oxygen atoms the in ambient air<sup>6,7</sup>. The UV-vis spectrum (Figure S8 b) illustrated a ~ 3.3eV band gap of the GaN film, which is in consistent with the previous report using urea as nitrogen sources<sup>5</sup>.

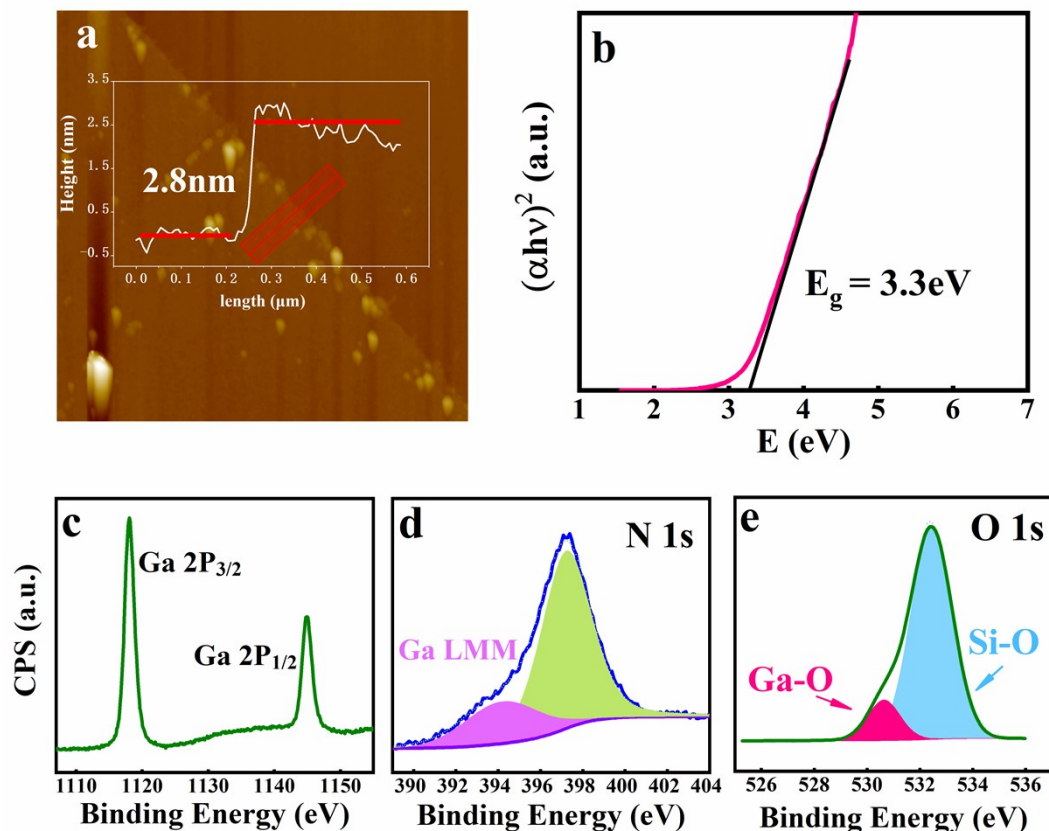

**Fig. S9** (a) AFM topography and height profile of the GaN film nitridated using urea as nitrogen precursor through APCVD. (b) UV-Vis spectrum of the GaN film featured a 3.3 eV optical bandgap. (c-e) XPS Ga2p, N1s and O1s of the GaN film.

## References:

1. A. Plech, U. Klemradt, H. Metzger and J. Peisl, *J. Phys. Condens. Matter*, 1998, 10, 971-982.
2. G. W. R. Leibbrandt, G. Hoogers and F. H. P. M. Habraken, *Phys. Rev. Lett.*, 1992, 68, 1947-1950.
3. N. Cabrera and N. F. Mott, *Rep. Prog. Phys.*, 1949, 12, 163-184.
4. A. Zavabeti, J. Z. Ou, B. J. Carey, N. Syed, R. Orrell-Trigg, E. L. H. Mayes, C. Xu, O. Kavehei, A. P. O'Mullane, R. B. Kaner, K. Kalantar-zadeh and T. Daeneke, *Science*, 2017, 358, 332-335.
5. N. Syed, A. Zavabeti, K. A. Messalea, E. Della Gaspera, A. Elbourne, A. Jannat, M. Mohiuddin, B. Y. Zhang, G. Zheng, L. Wang, S. P. Russo, E. Dorna, C. F. McConville, K. Kalantar-Zadeh and T. Daeneke, *J. Am. Chem. Soc.*, 2019, 141, 104-108.
6. T. Mattila and R. M. J. P. R. B. Nieminen, *Phys. Rev., B*, 1996, 54, 16676.
7. D. Kisailus, J. H. Choi and F. F. Lange, *J. Cryst. Growth*, 2003, 249, 106-120.
